# Supplementary material for: The Honey Bee: An Active Biosampler of Environmental Pollution and a Possible Warning Biomarker for Human Health
Source: MDPI journal article supplement (doi:10.3390/app11146481), 2021-07-14
Supplement: s1 [file s1]

**Table S1.** List of the active substances studied (limit of quantification = 10 µg/kg).

| Active substances                              | Substance group         | Main use <sup>a</sup> | Detection method |
|------------------------------------------------|-------------------------|-----------------------|------------------|
| 2,4-Dichlorophenoxyacetic acid                 | auxin                   | HB                    | LC-MS/MS         |
| 2,4-dimethylaniline (DMA) (Amitraz metabolite) | amidine                 | AC                    | LC-MS/MS         |
| Abamectin                                      | avermectin              | IN-AC                 | LC-MS/MS         |
| Acetamiprid                                    | neonicotinoid           | IN                    | LC-MS/MS         |
| Acrinathrin                                    | pyrethroid              | IN-AC                 | GC-MS/MS         |
| Aldicarb                                       | carbamate               | IN-AC-NE              | LC-MS/MS         |
| Aldicarb-sulfone (Aldicarb metabolite)         | carbamate               | IN-AC-NE              | LC-MS/MS         |
| Aldicarb-sulfoxide (Aldicarb metabolite)       | carbamate               | IN-AC-NE              | LC-MS/MS         |
| Alpha-Endosulfan                               | organochlorine          | IN-AC                 | GC-MS/MS         |
| Amitraz                                        | amidine                 | AC                    | LC-MS/MS         |
| Azoxystrobin                                   | strobilurin             | FU                    | LC-MS/MS         |
| Benalaxyl                                      | Acylalanine             | FU                    | LC-MS/MS         |
| Beta-Endosulfan                                | organochlorine          | IN-AC                 | GC-MS/MS         |
| Bifenthrin                                     | pyrethroid              | IN-AC                 | GC-MS/MS         |
| Bitertanol                                     | triazole                | FU                    | LC-MS/MS         |
| Boscalid                                       | carboxamide             | FU                    | LC-MS/MS         |
| Bromopropylate                                 | benzilate               | AC                    | LC-MS/MS         |
| Bupirimate                                     | pyrimidinol             | FU                    | LC-MS/MS         |
| Captan                                         | phtalimide              | FU-BA                 | GC-MS/MS         |
| Carbaryl                                       | carbamate               | IN-PG                 | LC-MS/MS         |
| Carbendazim                                    | benzimidazole           | FU                    | LC-MS/MS         |
| Carbofuran*                                    | carbamate               | IN-AC-NE              | LC-MS/MS         |
| Carbofuran-3-hydroxy (Carbofuran metabolite)   | carbamate               | IN-AC-NE              | LC-MS/MS         |
| Carbofuran-3-keto (Carbofuran metabolite)      | carbamate               | IN-AC-NE              | LC-MS/MS         |
| Carboxine                                      | oxathiin                | FU                    | LC-MS/MS         |
| Chlorfenvinphos                                | organophosphate         | IN-AC                 | GC-MS/MS         |
| Chloridazon                                    | pyridazinone            | HB                    | LC-MS/MS         |
| Chlormequat chloride                           | quaternary ammonium     | PG                    | LC-MS/MS         |
| Chlorpropham                                   | carbamate               | HB-PG                 | GC-MS/MS         |
| Chlorpyrifos                                   | organophosphate         | IN                    | GC-MS/MS         |
| Chlorpyrifos-methyl                            | organophosphate         | IN-AC                 | LC-MS/MS         |
| Clomazone                                      | isoxazolidinone         | HB                    | LC-MS/MS         |
| Clothianidin                                   | neonicotinoid           | IN                    | LC-MS/MS         |
| Coumaphos                                      | organophosphate         | IN-AC                 | GC-MS/MS         |
| Cyfluthrin-beta                                | pyretroid               | IN                    | GC-MS/MS         |
| Cyhalothrin                                    | pyretroid               | IN                    | GC-MS/MS         |
| Cypermethrin                                   | pyretroid               | IN                    | GC-MS/MS         |
| Cyproconazole                                  | triazole                | FU                    | LC-MS/MS         |
| Cyprodinil                                     | anilinopyrimidine       | FU                    | LC-MS/MS         |
| Deltamethrin                                   | pyretroid               | IN                    | GC-MS/MS         |
| Diflubenzuron                                  | benzoylurea             | IN                    | LC-MS/MS         |
| Dimethoate                                     | organophosphate         | IN-AC                 | LC-MS/MS         |
| Dimethomorph                                   | morpholine              | FU                    | LC-MS/MS         |
| Dinotefuran                                    | neonicotinoid           | IN                    | LC-MS/MS         |
| Dithianon                                      | quinone                 | FU                    | LC-MS/MS         |
| Dodemorph                                      | morpholine (isomer mix) | FU                    | LC-MS/MS         |
| Dodine                                         | guanidine               | FU                    | LC-MS/MS         |
| Emamectin                                      | avermectin              | IN-AC                 | LC-MS/MS         |
| Esfenvalerate                                  | pyretroid               | IN                    | GC-MS/MS         |
| Ethoprophos                                    | organophosphate         | IN-NE                 | GC-MS/MS         |
| Etofenprox                                     | pyretroid               | IN                    | LC-MS/MS         |
| Etoxazole                                      | diphenyl oxazoline      | AC                    | LC-MS/MS         |
| Etridiazole                                    | aromatic hydrocarbon    | FU                    | GC-MS/MS         |

|                                                                |                          |          |          |
|----------------------------------------------------------------|--------------------------|----------|----------|
| Fenamidone                                                     | imidazole                | FU       | LC-MS/MS |
| Fenamiphos                                                     | organophosphate          | NE       | LC-MS/MS |
| Fenamiphos sulfone (Fenamiphos metabolite)                     | organophosphate          | NE       | LC-MS/MS |
| Fenamiphos sulfoxide (Fenamiphos metabolite)                   | organophosphate          | NE       | LC-MS/MS |
| Fenarimol                                                      | pyrimidine               | FU       | LC-MS/MS |
| Fenazaquin                                                     | quinazoline              | IN-AC    | LC-MS/MS |
| Fenbuconazole                                                  | triazole                 | FU       | LC-MS/MS |
| Fenothiocarb                                                   | thiocarbamate            | AC       | LC-MS/MS |
| Fenoxycarb                                                     | carbamate                | IN       | LC-MS/MS |
| Fenpropidin                                                    | piperidine               | FU       | LC-MS/MS |
| Fenpropimorph                                                  | morpholine               | FU       | LC-MS/MS |
| Fenpyroximate                                                  | pyrazole                 | IN-AC    | LC-MS/MS |
| Fenvalerate                                                    | pyrethroid               | IN-AC    | GC-MS/MS |
| Fipronil                                                       | phenylpyrazole           | IN       | GC-MS/MS |
| Fipronil sulfone (Fipronil metabolite)                         | phenylpyrazole           | IN       | GC-MS/MS |
| Flazasulfuron                                                  | sulfonylurea             | HB       | LC-MS/MS |
| Fluazifop- <i>P</i> -butyl                                     | aryloxyphenoxypropionate | HB       | LC-MS/MS |
| Flufenacet                                                     | oxyacetamide             | HB       | LC-MS/MS |
| Fludioxonil                                                    | phenylpyrrole            | FU       | LC-MS/MS |
| Flumethrin                                                     | pyrethroid               | IN       | GC-MS/MS |
| Fluopicolide                                                   | benzamide                | FU       | GC-MS/MS |
| Fluopyram                                                      | benzamide, pyramide      | FU-NE    | GC-MS/MS |
| Fluquinconazole                                                | triazole                 | FU       | GC-MS/MS |
| Flupyradifurone                                                | butenolide               | IN       | LC-MS/MS |
| Flusilazole                                                    | triazole                 | FU       | LC-MS/MS |
| Flutriafol                                                     | triazole                 | FU       | LC-MS/MS |
| Folpet                                                         | phtalimide               | FU       | GC-MS/MS |
| Formetanate                                                    | formamidine              | IN-AC    | LC-MS/MS |
| Fosthiazate                                                    | organophosphate          | IN-NE    | LC-MS/MS |
| Imazalil                                                       | imidazole                | FU       | LC-MS/MS |
| Imazosulfuron                                                  | sulfonylurea             | HB       | LC-MS/MS |
| Imidacloprid                                                   | neonicotinoid            | IN       | LC-MS/MS |
| Indoxacarb                                                     | oxadiazine               | IN       | GC-MS/MS |
| Iprodione                                                      | dicarboximide            | FU       | GC-MS/MS |
| Iprovalicarb                                                   | carbamate                | FU       | LC-MS/MS |
| Isopyrazam                                                     | pyrazole                 | FU       | GC-MS/MS |
| Isoxaflutole                                                   | oxyacetamide             | HB       | LC-MS/MS |
| Kresoxim-methyl                                                | strobilurin              | FU       | GC-MS/MS |
| Lambda-cyhalothrin                                             | pyrethroid               | IN       | GC-MS/MS |
| Linuron                                                        | urea                     | HB       | LC-MS/MS |
| Malaoxon (Malathion metabolite)                                | organophosphate          | IN-AC    | LC-MS/MS |
| Malathion                                                      | organophosphate          | IN-AC    | LC-MS/MS |
| Mepanipyrim                                                    | anilinopyrimidine        | FU       | LC-MS/MS |
| Metalaxyl                                                      | phenylamide              | FU       | LC-MS/MS |
| Metamitron                                                     | triazinone               | HB       | LC-MS/MS |
| Metazachlor                                                    | chloroacetamide          | HB       | LC-MS/MS |
| Methiocarb                                                     | carbamate                | IN-MO-RE | LC-MS/MS |
| Methiocarb sulfoxide (Methiocarb metabolite)                   | carbamate                | IN-MO-RE | LC-MS/MS |
| Methomyl                                                       | carbamate                | IN-AC    | LC-MS/MS |
| Metolachlor                                                    | chloroacetanilide        | HB       | LC-MS/MS |
| Metrafenone                                                    | benzophenone             | FU       |          |
| Metribuzin                                                     | triazinone               | HB       | LC-MS/MS |
| Myclobutanil                                                   | triazole                 | FU       | GC-MS/MS |
| N-(2,4-Dimethylphenyl)formamide (DMPF)<br>(Amitraz metabolite) | amidine                  | AC       | LC-MS/MS |

|                                                                        |                   |          |          |
|------------------------------------------------------------------------|-------------------|----------|----------|
| N-(2,4-Dimethylphenyl)-N'-methylformamidine (DMF) (Amitraz metabolite) | amidine           | AC       | LC-MS/MS |
| Norflurazon                                                            | pyridazinone      | HB       | LC-MS/MS |
| Nytempiram <sup>o</sup>                                                | neonicotinoid     | IN       | LC-MS/MS |
| Omethoate (Dimethoate metabolite)                                      | organophosphate   | IN-AC    | LC-MS/MS |
| Oxamyl                                                                 | carbamate         | IN-AC-NE | LC-MS/MS |
| Penconazole                                                            | triazole          | FU       | GC-MS/MS |
| Pencycuron                                                             | phenylurea        | FU       | LC-MS/MS |
| Pendomethalin                                                          | dinitroaniline    | HB       | GC-MS/MS |
| Permethrin                                                             | pyretroid         | IN       | GC-MS/MS |
| Phosmet                                                                | organophosphate   | IN-AC    | GC-MS/MS |
| Pinoxaden                                                              | phenylpyrazole    | HB       | GC-MS/MS |
| Piperonyl butoxide                                                     | safrole           | SY       | LC-MS/MS |
| Pirimicarb                                                             | carbamate         | IN       | LC-MS/MS |
| Pirimicarb-desmethyl (Pirimicarb metabolite)                           | carbamate         | IN       | LC-MS/MS |
| Pirimiphos-methyl                                                      | organophosphate   | IN-AC    | LC-MS/MS |
| Prochloraz                                                             | imidazole         | FU       | LC-MS/MS |
| Procymidone                                                            | dicarboximide     | FU       | GC-MS/MS |
| Propamocarb                                                            | carbamate         | FU       | LC-MS/MS |
| Propiconazole                                                          | triazole          | FU       | LC-MS/MS |
| Propyzamide                                                            | benzamide         | HB       | LC-MS/MS |
| Pyraclostrobin                                                         | strobilurin       | FU       | LC-MS/MS |
| Pyridaben                                                              | pyridazinone      | IN-AC    | LC-MS/MS |
| Pyrimethanil                                                           | anilinopyrimidine | FU       | LC-MS/MS |
| Pyriproxyfen                                                           | unclassified      | IN       | LC-MS/MS |
| Quinoxifen                                                             | quinoline         | FU       | GC-MS/MS |
| Rimsulfuron                                                            | sulfonylurea      | HB       | LC-MS/MS |
| Rotenone                                                               | isoflavones       | IN       | LC-MS/MS |
| Simazine                                                               | triazine          | HB       | LC-MS/MS |
| Spirodiclofen                                                          | tetronic acid     | IN-AC    | LC-MS/MS |
| Spirotetramat                                                          | tetramic acid     | IN       | LC-MS/MS |
| Sulfoxaflor                                                            | sulfoximine       | IN       | LC-MS/MS |
| Tau-Fluvalinate                                                        | pyretroid         | IN-AC    | GC-MS/MS |
| Tebuconazole                                                           | triazole          | FU       | LC-MS/MS |
| Tebufenozide                                                           | diacylhydrazine   | IN       | LC-MS/MS |
| Tebufenpyrad                                                           | pyrazole          | AC       | LC-MS/MS |
| Teflubenzuron                                                          | benzoylurea       | IN       | LC-MS/MS |
| Tefluthrin                                                             | pyrethroid        | IN       | LC-MS/MS |
| Tepraloxydim                                                           | cyclohexanedione  | HB       | LC-MS/MS |
| Terbuthylazine                                                         | triazine          | HB       | LC-MS/MS |
| Tetraconazole                                                          | triazole          | FU       | LC-MS/MS |
| Tetramethrin                                                           | pyrethroid        | IN       | GC-MS/MS |
| Thiabendazole                                                          | benzimidazole     | FU       | LC-MS/MS |
| Thiacloprid                                                            | neonicotinoid     | IN       | LC-MS/MS |
| Thiamethoxam                                                           | neonicotinoid     | IN       | LC-MS/MS |
| Thifensulfuron-methyl                                                  | sulfonylurea      | HB       | LC-MS/MS |
| Thiobencarb                                                            | thiocarbamate     | HB       | LC-MS/MS |
| Thiodicarb                                                             | carbamate         | IN       | LC-MS/MS |
| Thiophanate-methyl                                                     | benzimidazole     | FU       | LC-MS/MS |
| Thiram                                                                 | dithiocarbamate   | FU       | LC-MS/MS |
| Tolclofos-methyl                                                       | chlorophenyl      | FU       | GC-MS/MS |
| Tribenuron-methyl                                                      | sulfonylurea      | HB       | LC-MS/MS |
| Trifloxystrobin                                                        | strobilurin       | FU       | GC-MS/MS |
| Triflumuron                                                            | benzoylurea       | IN       | LC-MS/MS |
| Triticonazole                                                          | triazole          | FU       | LC-MS/MS |

<sup>a</sup> AC acaricide, BA bactericide, FU fungicide, HB herbicide, IN insecticide, MO molluscicide, NE nematocide, PG Plant Growth regulator, RE repellent, SY synergist

LC-MS/MS Liquid Chromatography coupled with tandem Mass Spectrometry, GC-MS/MS Gas Chromatography coupled with tandem Mass Spectrometry
